# Supplementary material for: Risky Sure Things
Source: Atypon-hosted journal article supplement (doi:10.1287/mnsc.2022.4590), 2022-11-03

**Risky Sure Things, Online Supplement**

This online supplement contains full histograms of the ratings in Experiments 1, 2, and 3A.

Experiment 1 – Histograms for the MTurk version of the experiment:

**Ratings of coin flip**

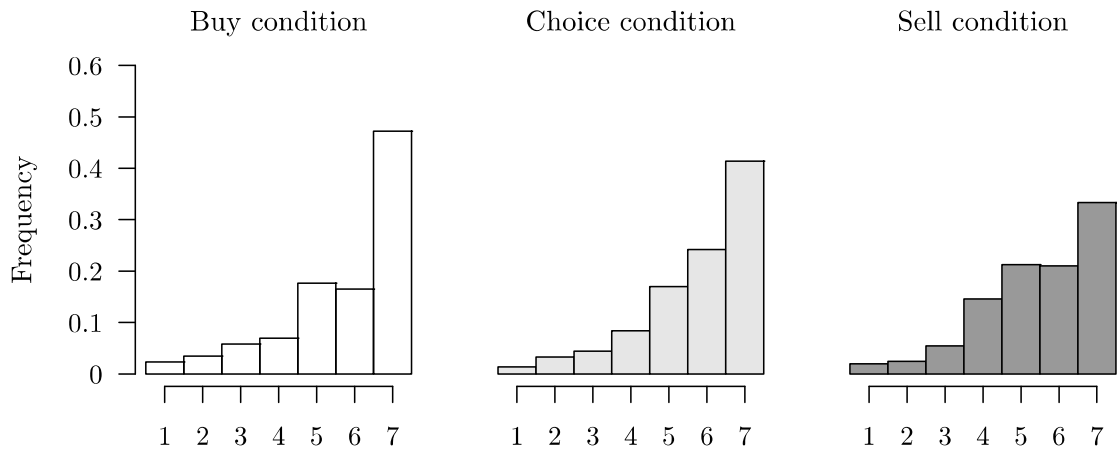

**Ratings of sure cash**

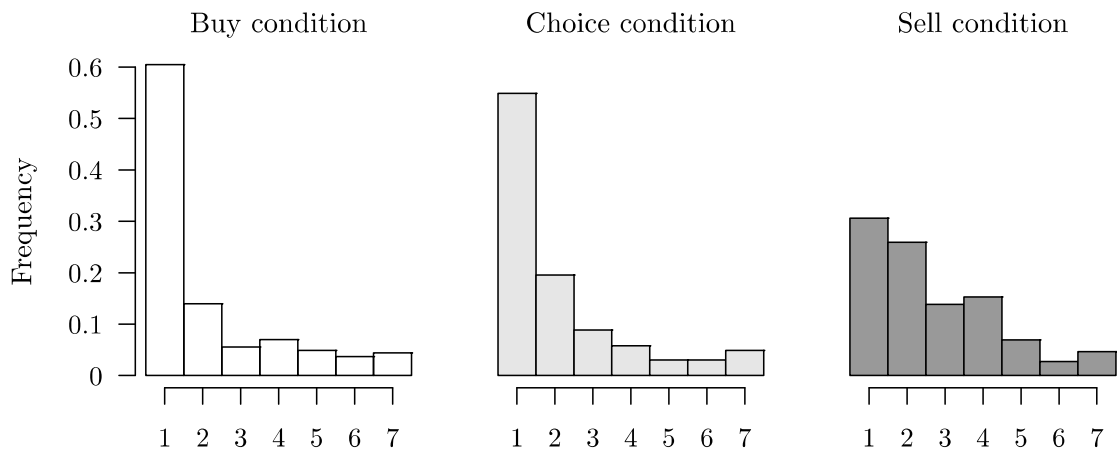

Experiment 1 – Histograms for the laboratory version of the experiment:

Ratings of coin flip

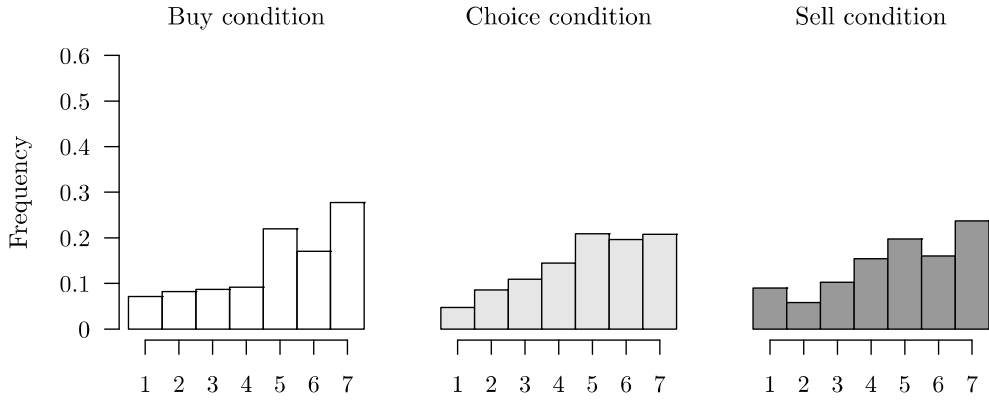

Ratings of sure cash

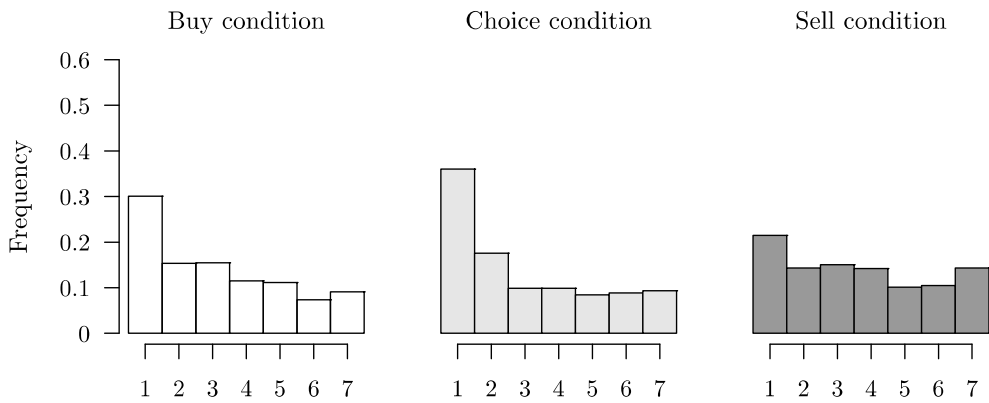

Experiment 2 – Histograms for the Focal Coin Flip vs. Sure cash pairing:

### Ratings of coin flip

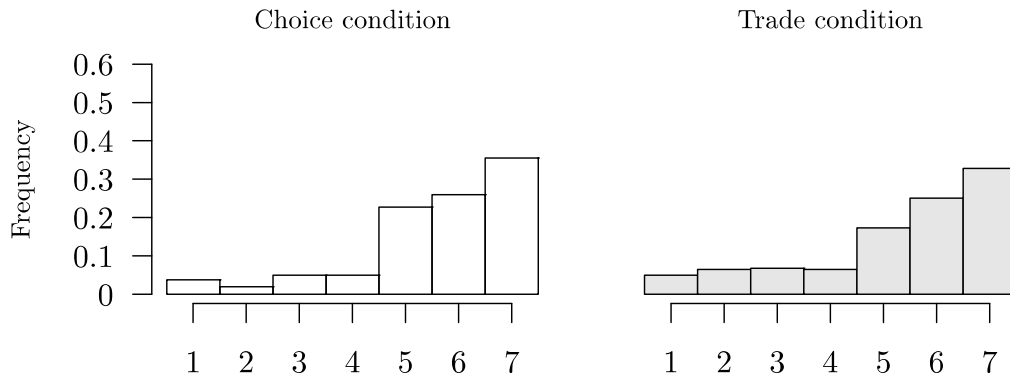

### Ratings of sure cash

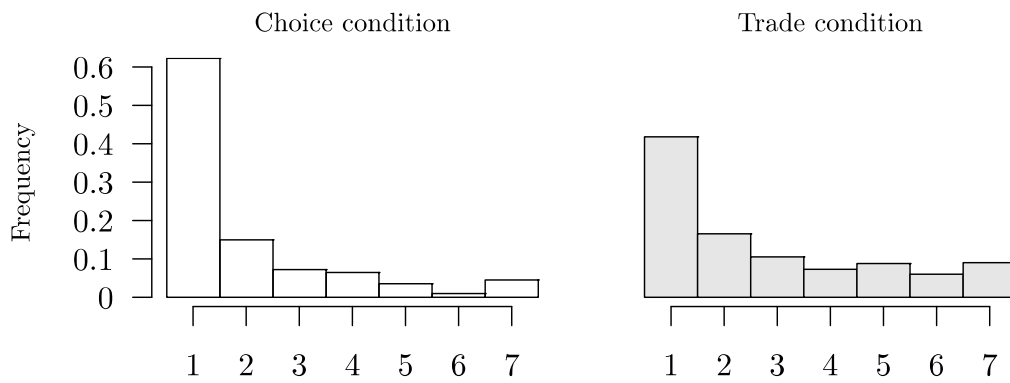

Experiment 2 – Histograms for the Focal Coin Flip vs. Narrow Coin Flip pairings:

### Ratings of coin flip

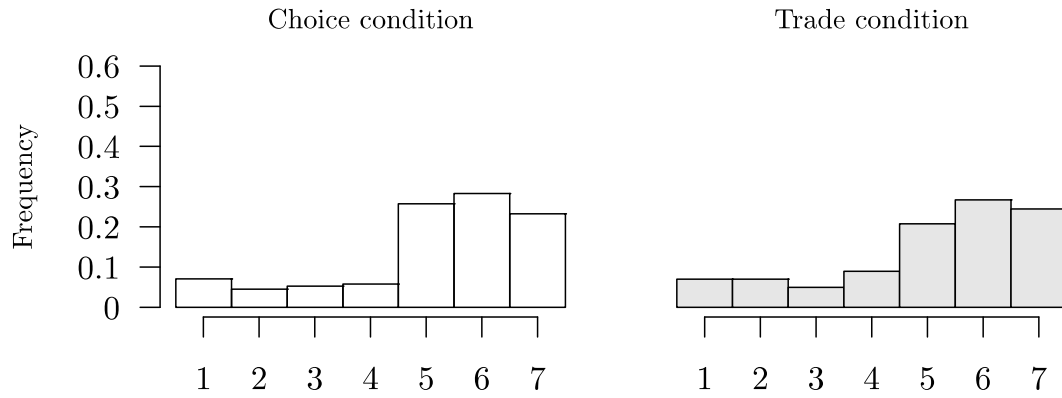

### Ratings of narrow alternative

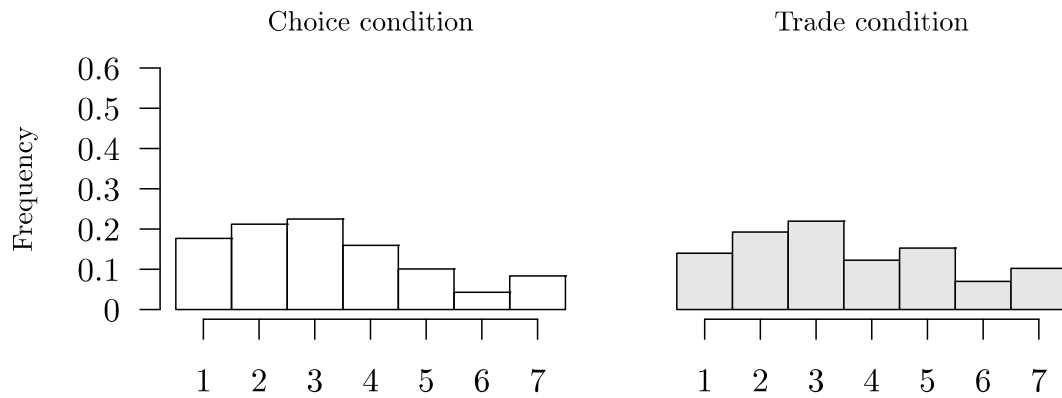

Experiment 2 – Histograms for the Focal Coin Flip vs. Wide Coin Flip pairings:

### Ratings of coin flip

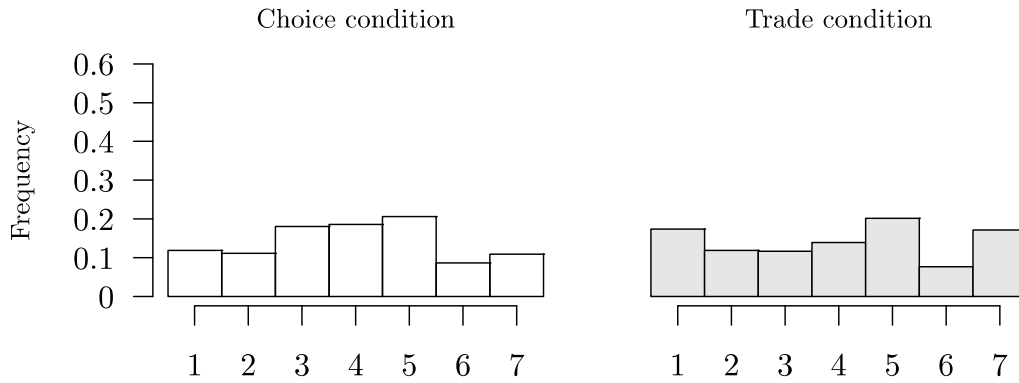

### Ratings of wide alternative

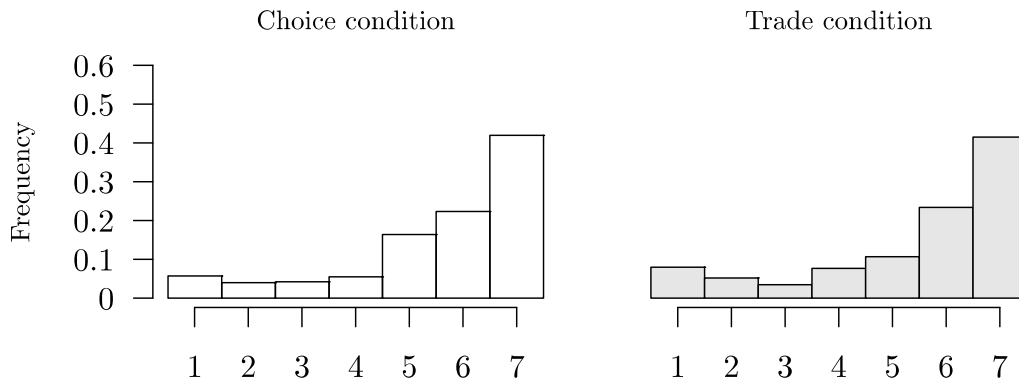

Experiment 3A – Histograms for the Certain Bus Conditions:

Ratings of certain bus

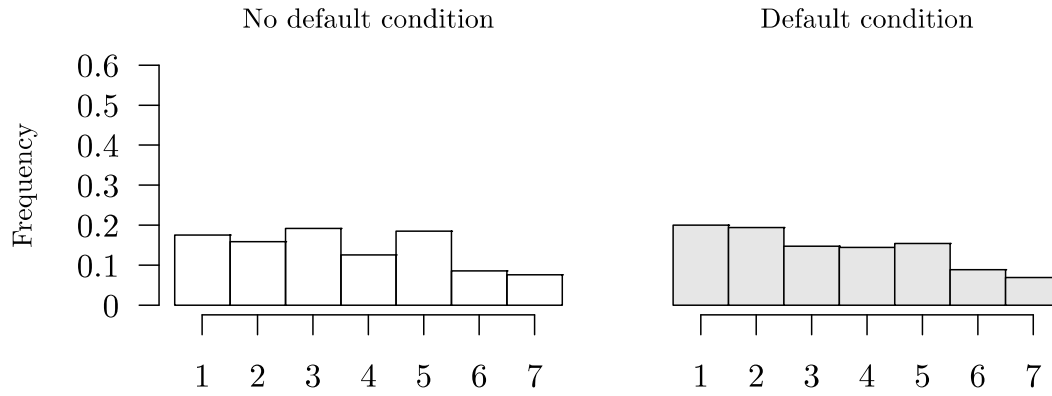

Ratings of taxi

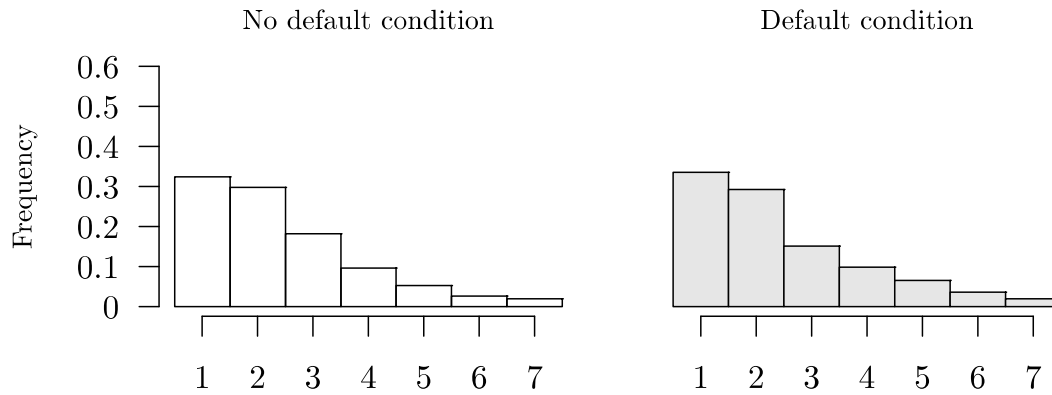

Experiment 3A – Histograms for the Uncertain Bus Conditions:

Ratings of uncertain bus

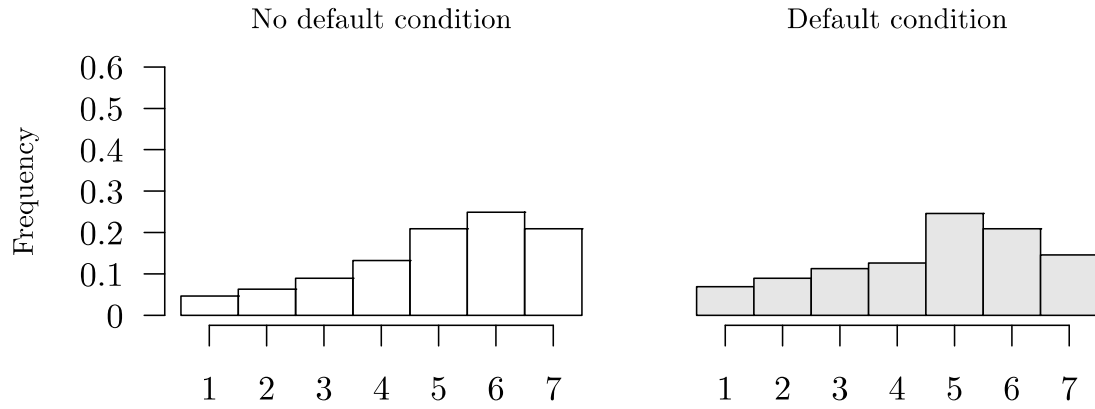

Ratings of taxi

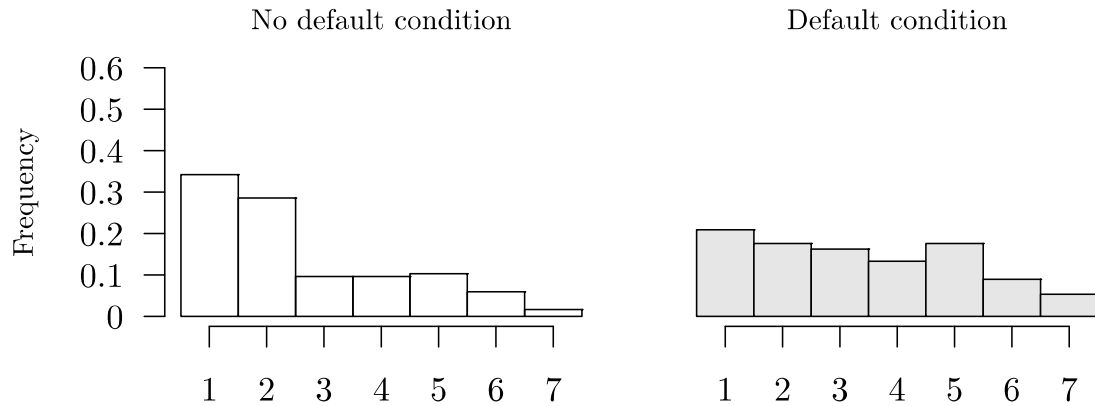

Supplement: mnsc.2022.4590.sm1.pdf [file mnsc.2022.4590.sm1.pdf]
